# Supplementary material for: Disruption of FOXO3a-miRNA feedback inhibition of IGF2/IGF-1R/IRS1 signaling confers Herceptin resistance in HER2-positive breast cancer
Source: PubMed Central journal article supplement (PMC8113606; doi:10.1038/s41467-021-23052-9), 2021-05-11
Supplement: 41467_2021_23052_MOESM1_ESM.pdf [file 41467_2021_23052_MOESM1_ESM.pdf]

## Supplementary Information

### **Disruption of FOXO3a-miRNA feedback inhibition of IGF2/IGF-1R/IRS1 signaling confers Herceptin resistance in HER2-positive breast cancer**

Liyun Luo<sup>1#</sup>, Zhijie Zhang<sup>1#</sup>, Ni Qiu<sup>1#</sup>, Li Ling<sup>1</sup>, Xiaoting Jia<sup>1</sup>, Ying Song<sup>1</sup>, Hongsheng Li<sup>1</sup>, Jiansheng Li<sup>1</sup>, Hui Lyu<sup>2</sup>, Hao Liu<sup>1</sup>, Zhimin He<sup>1\*</sup>, Bolin Liu<sup>2\*</sup>, and Guopei Zheng<sup>1,3\*</sup>

<sup>1</sup>Affiliated Cancer Hospital & Institute of Guangzhou Medical University, Guangzhou, Guangdong 510095 China

<sup>2</sup>Department of Genetics, Stanley S. Scott Cancer Center, School of Medicine, Louisiana State University (LSU) Health Sciences Center, New Orleans, LA 70112 USA

<sup>3</sup>Guangzhou Municipal and Guangdong Provincial Key Laboratory of Protein Modification and Degradation, Guangzhou, Guangdong 510095 China

# These authors contributed equally: Liyun Luo, Zhijie Zhang, Ni Qiu

## Supplementary figures

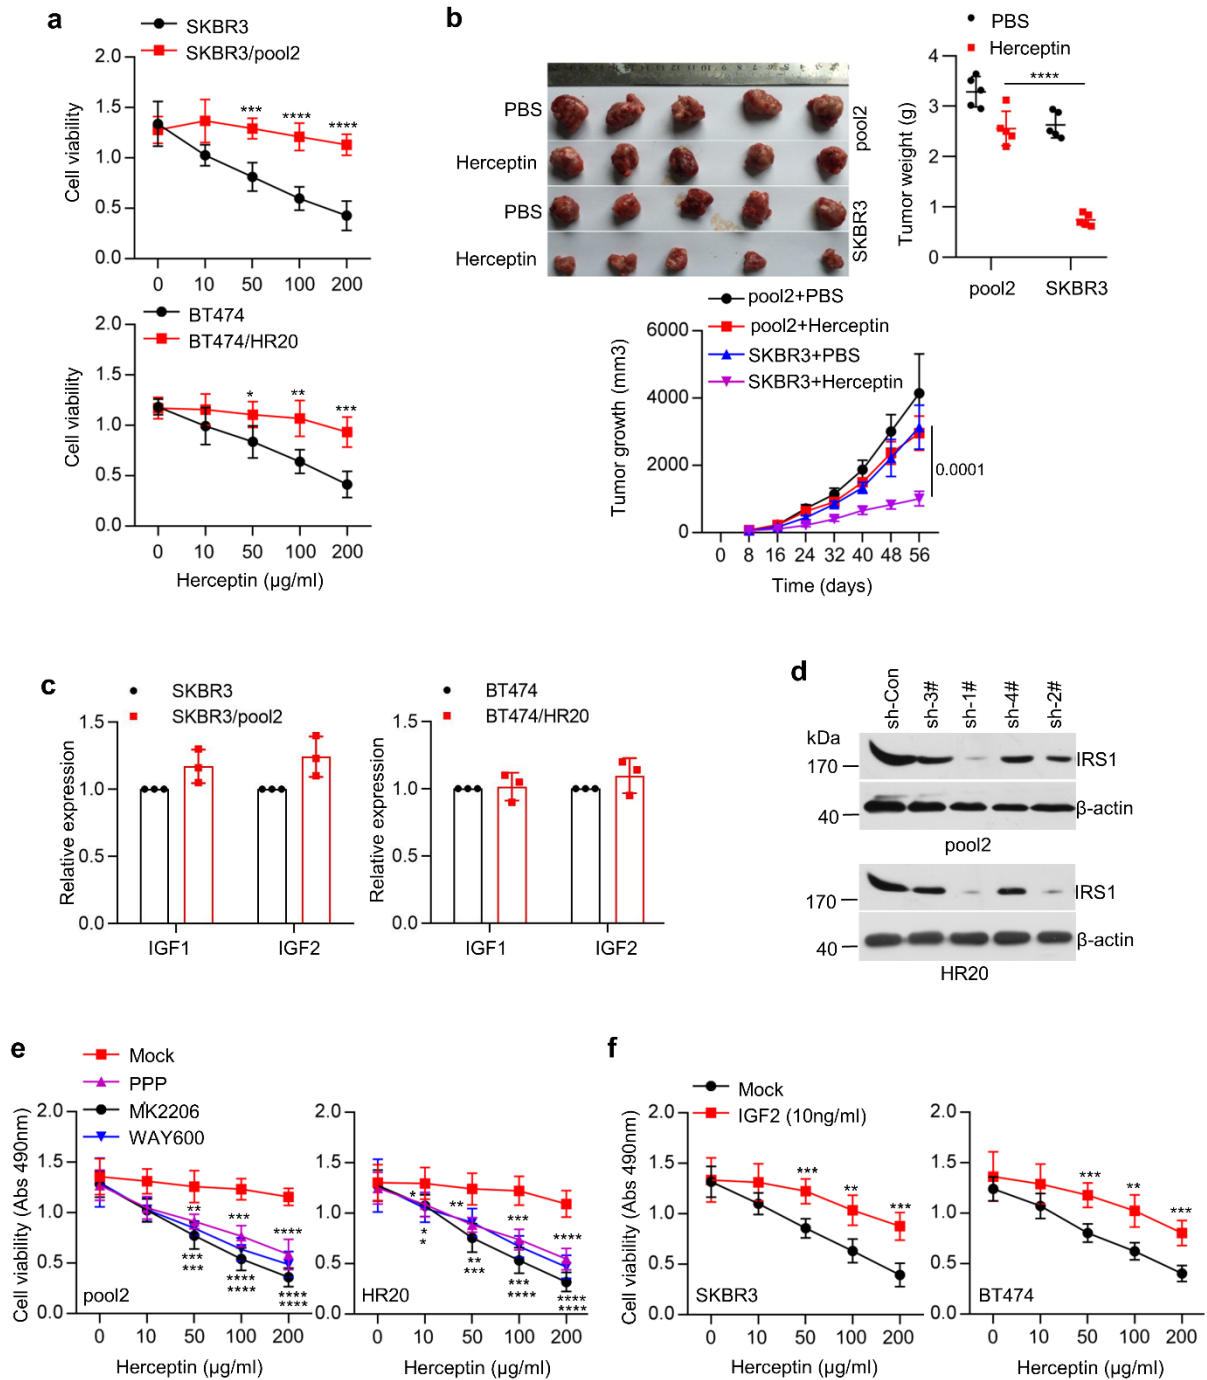

### Supplementary figure 1. IGF2/IGF-1R/IRS1/Akt/mTOR signaling pathway was involved in resistance to Herceptin in HER2-positive breast cancer cells.

**a** SKBR3, SKBR3/pool2 (pool2), BT474, or BT474/HR20 (HR20) cells were treated with Herceptin at indicated concentrations for 72 hrs. Cell viability was evaluated by MTS assays, SKBR3/pool2: \*\*\*  $p=0.0003$ , \*\*\*\*  $p<0.0001$ , BT474/HR20: \*  $p=0.0184$ , \*\*  $p=0.002$ , \*\*\*  $p=0.0004$ . **b** SKBR3 or pool2 cells were inoculated subcutaneously into the armpit of female Balb/C athymic nude mice to

generate tumor xenografts. When the tumor size reached  $\sim 100 \text{ mm}^3$ , the mice were randomly grouped and injected intraperitoneally (i.p.) with PBS or Herceptin (10 mg/kg) (n=5) once every 5 days. At the experimental endpoint, tumors were excised and pictured. The tumor weights and sizes were also measured, \*\*\*\*  $p < 0.0001$ . **c** The mRNA expression levels of *IGF1* and *IGF2* in the cells were measured by qRT-PCR. **d** Pool2 or HR20 cells were transfected with control shRNA (sh-Con) or specific *IRS1* shRNAs (sh-1#, sh-2#, sh-3#, or sh-4#). The expression of IRS1 was examined by western blot assays, Data show a representative of three independent experiments. **e** Pool2 or HR20 cells were treated with vehicle (Mock) or PPP (1  $\mu\text{M}$ ), MK2206 (1  $\mu\text{M}$ ), or WAY600 (1  $\mu\text{M}$ ) in combination with Herceptin at indicated concentrations for 72 hrs. Cell viability was evaluated by MTS assays, Pool2 PPP: \*\*  $p = 0.0022$ , \*\*\*  $p = 0.0001$ , \*\*\*\*  $p < 0.0001$ , Pool2 MK2206: \*\*\*  $p = 0.0008$ , \*\*\*\*  $p < 0.0001$ , Pool2 WAY600: \*\*\*  $p = 0.0007$ , \*\*\*\*  $p < 0.0001$ , HR20 PPP: \*  $p = 0.0456$ , \*\*  $p = 0.0018$ , \*\*\*  $p = 0.0003$ , \*\*\*\*  $p < 0.0001$ , HR20 MK2206: \*  $p = 0.0312$ , \*\*\*  $p = 0.0009$ , \*\*\*\*  $p < 0.0001$ , HR20 WAY600: \*  $p = 0.0298$ , \*\*  $p = 0.0076$ , \*\*\*  $p = 0.0001$ , \*\*\*\*  $p < 0.0001$ . **f** SKBR3 or BT474 cells were treated with rhIGF2 (10 ng/ml) in combination with Herceptin at indicated concentrations for 72 hrs. Cell viability was evaluated by MTS assays, SKBR3: \*\*\*  $p = 0.0007$ , \*\*  $p = 0.0015$ , \*\*\*  $p = 0.0003$ , BT474: \*\*\*  $p = 0.0006$ , \*\*  $p = 0.0011$ , \*\*\*  $p = 0.0003$ . Statistical significance was determined by a two-tailed Student's t test (a, b, e, f). Data show a representative of three independent experiments. Source data are provided as a Source Data file.

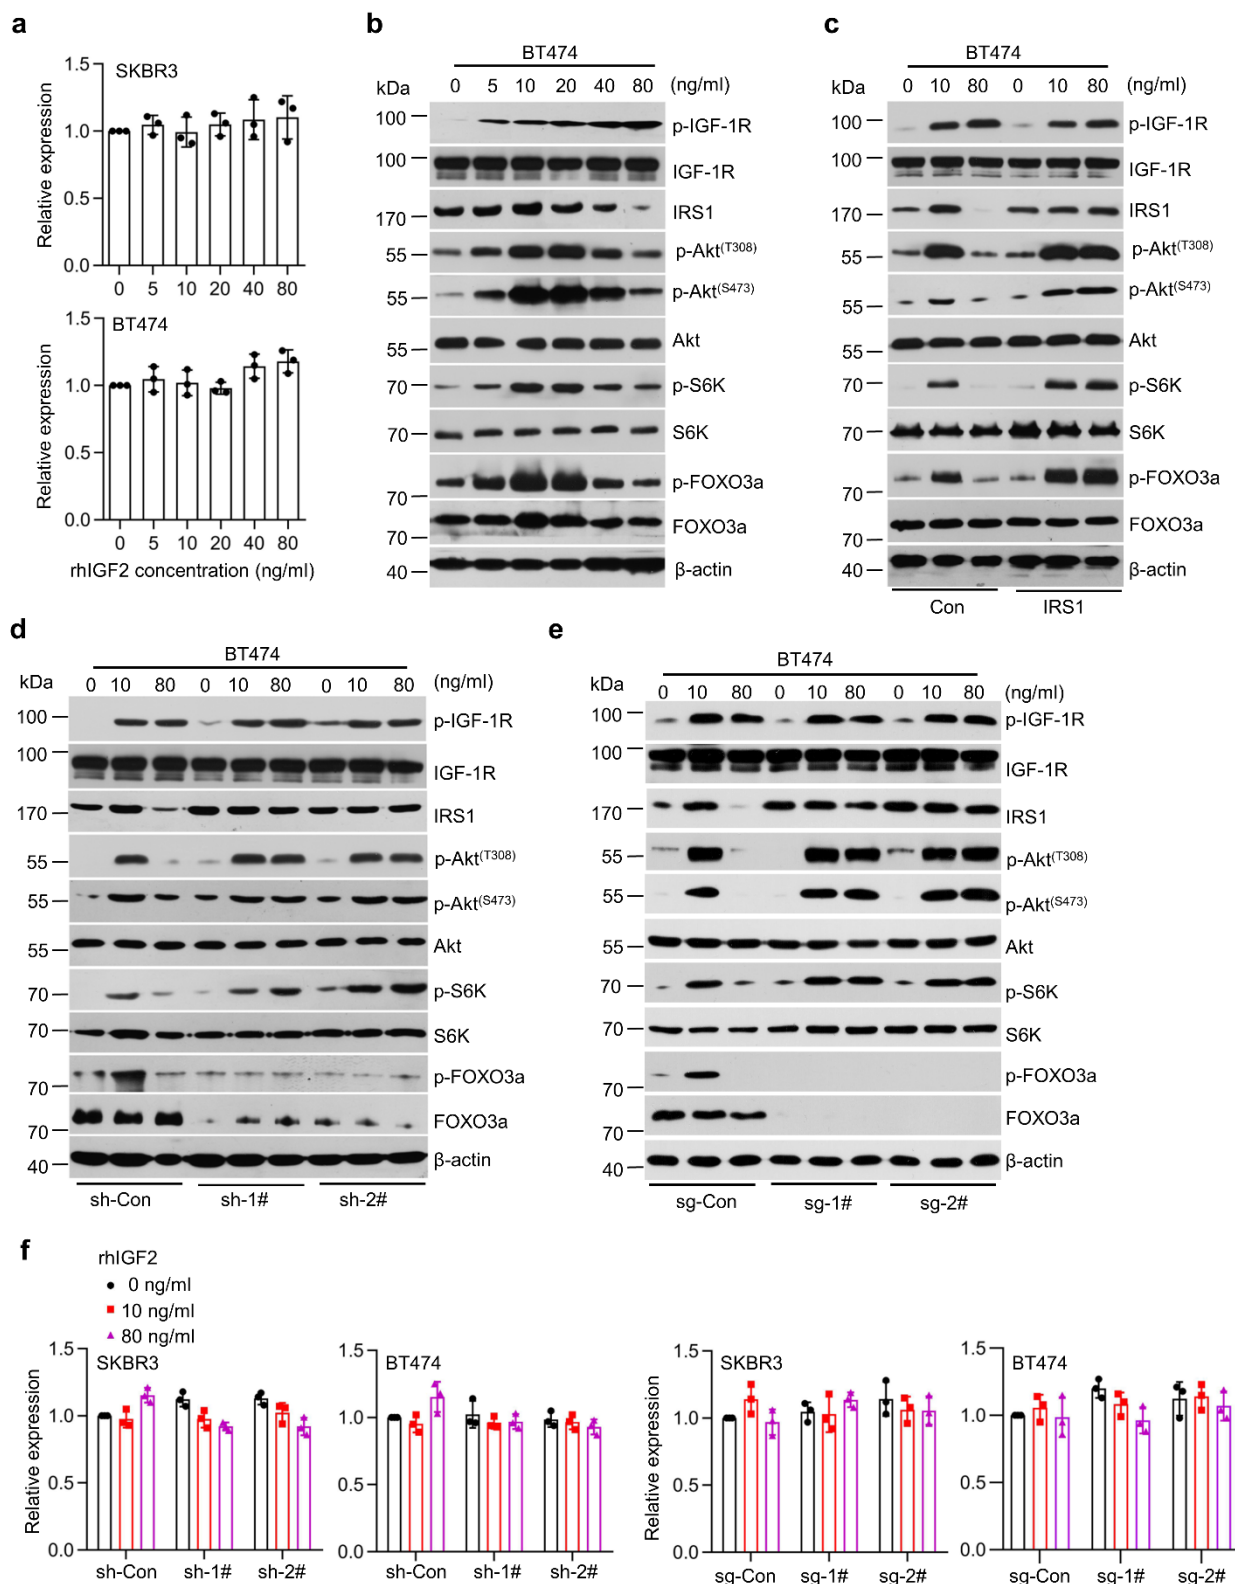

**Supplementary figure 2. A negative feedback inhibition loop of the IGF2/IGF-1R/IRS1/mTOR signaling was observed in HER2-positive breast cancer cells.**

**a** SKBR3 or BT474 cells were treated with rhIGF2 at indicated concentrations for 24 hrs. The expression of *IRS1* mRNA was measured by qRT-PCR. **b** BT474 cells were treated with rhIGF2 at indicated concentrations for 24 hrs. The expression of p-IGF-1R, IGF-1R, IRS1, p-Akt<sup>(S473)</sup>, p-

Akt<sup>(T308)</sup>, Akt, p-S6K, S6K, p-FOXO3a, FOXO3a, and  $\beta$ -actin was examined by western blot assays. **c** BT474 cells were transfected with a control vector (Con) or the same vector containing an *IRS1* cDNA (*IRS1*), followed by rhIGF2 treatment at indicated concentrations for 24 hrs. The cells were examined by western blot assays. **d-f** The indicated cells with downregulation of FOXO3a by either specific shRNAs (**d**) or *FOXO3a* gene deletion via CRISPER-Cas9 technology (**e**) were treated with rhIGF2 at indicated concentrations for 24 hrs. (**d, e**) The cells were examined by western blot assays. The mRNA expression levels of *IRS1* was measured by qRT-PCR (**f**). n = 3 biologically independent samples (a, f). Data are presented as mean values  $\pm$  SEM (a, f). Data show a representative of three independent experiments (b, c, d, e). Source data are provided as a Source Data file.

**a**

| TargetScan                      |                                                                           |           |
|---------------------------------|---------------------------------------------------------------------------|-----------|
|                                 | Predicted consequential pairing of target region (top) and miRNA (bottom) | Site type |
| Position 232-239 of IRS1 3' UTR | 5' ...CGAAAAAAAAAAAAUGCACUGUGA...                                         | 8mer      |
| hsa-miR-128-3p                  | 3' UUUUCUCUGGCCAAGUGACACU                                                 |           |
| Position 154-160 of IRS1 3' UTR | 5' ...GCAUCCAUUUCAGUUUGUUUACU...                                          | 7mer-m8   |
| hsa-miR-30a-5p                  | 3' GAAGGUCAGCUCCUACAAAUGU                                                 |           |

**b**

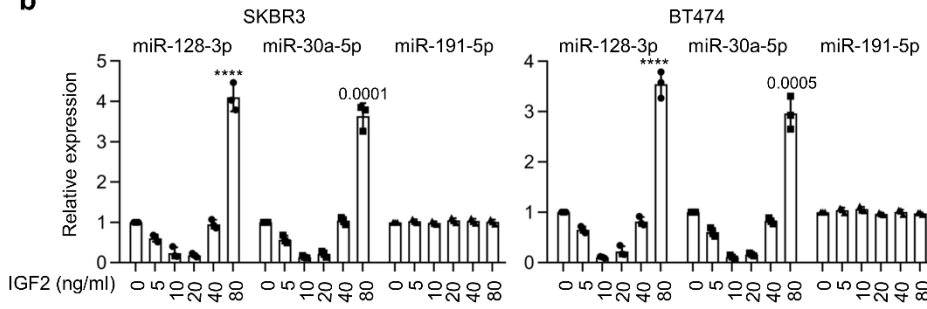

**e**

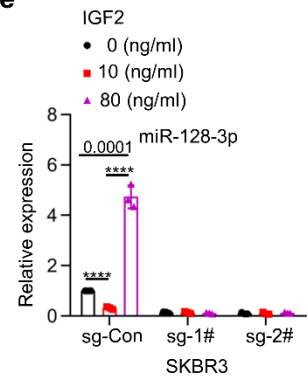

**c**

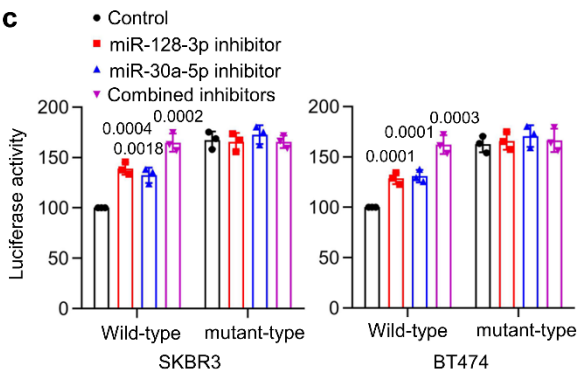

**d**

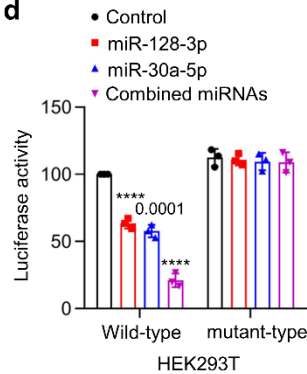

**f**

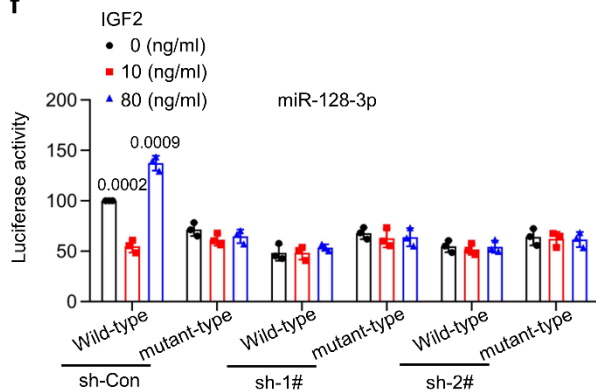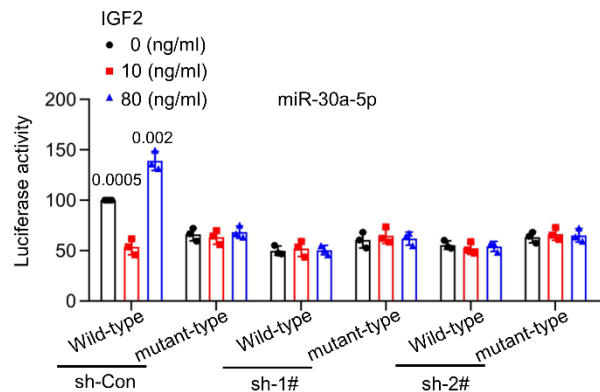

**Supplementary figure 3. FOXO3a regulated IRS1 expression via specific miRNAs.**

**a** A schematic representation of the seed sequences of miR-128-3p and miR-30a-5p in the 3'-UTR of *IRS1* mRNA. **b** SKBR3 or BT474 cells were treated with rhIGF2 at indicated concentrations for 24 hrs. The expression levels of miR-128-3p, miR-30-5p, and miR-191-5p were measured by qRT-PCR, \*\*\*\*  $p < 0.0001$ . **c, d** SKBR3 or BT474 cells were co-transfected with a luciferase reporter

vector containing either wild-type *IRS1* 3'-UTR or mutant *IRS1* 3'-UTR along with the inhibitor(s) of miR-128-3p or/and miR-30-5p (c), \*\*\*\*  $p < 0.0001$ . HEK293T cells were co-transfected with a luciferase reporter vector containing either wild-type *IRS1* 3'-UTR or mutant *IRS1* 3'-UTR along with the mimic(s) of miR-128-3p or/and miR-30-5p (d). The luciferase activity was determined using the Dual-Luciferase Reporter assays. The Renilla luciferase activity was used as internal control and the firefly luciferase activity was calculated as the mean  $\pm$  SD after being normalized by Renilla luciferase activity, \*\*\*\*  $p < 0.0001$ . e SKBR3 cells with *FOXO3a* gene deletion via CRISPR-Cas9 technology were treated with rhIGF2 at indicated concentrations for 24 hrs. The expression levels of miR-128-3p and miR-30-5p were measured by qRT-PCR, \*\*\*\*  $p < 0.0001$ . f SKBR3 cells were transfected with miR-128 or miR-30a promoter reporter vector containing either wild-type or mutant *FOXO3a* binding sites. The cells were then transfected with control shRNA (sh-Con) or specific *FOXO3a* shRNAs (sh-1# and sh-2#) and treated with rhIGF2 at indicated concentrations. The luciferase activity was measured by the reporter assays. n = 3 biologically independent samples (b-f). Data are presented as mean values  $\pm$  SEM (b-c, e-f). Statistical significance was determined by a two-tailed Student's t test (b-f). Source data are provided as a Source Data file.

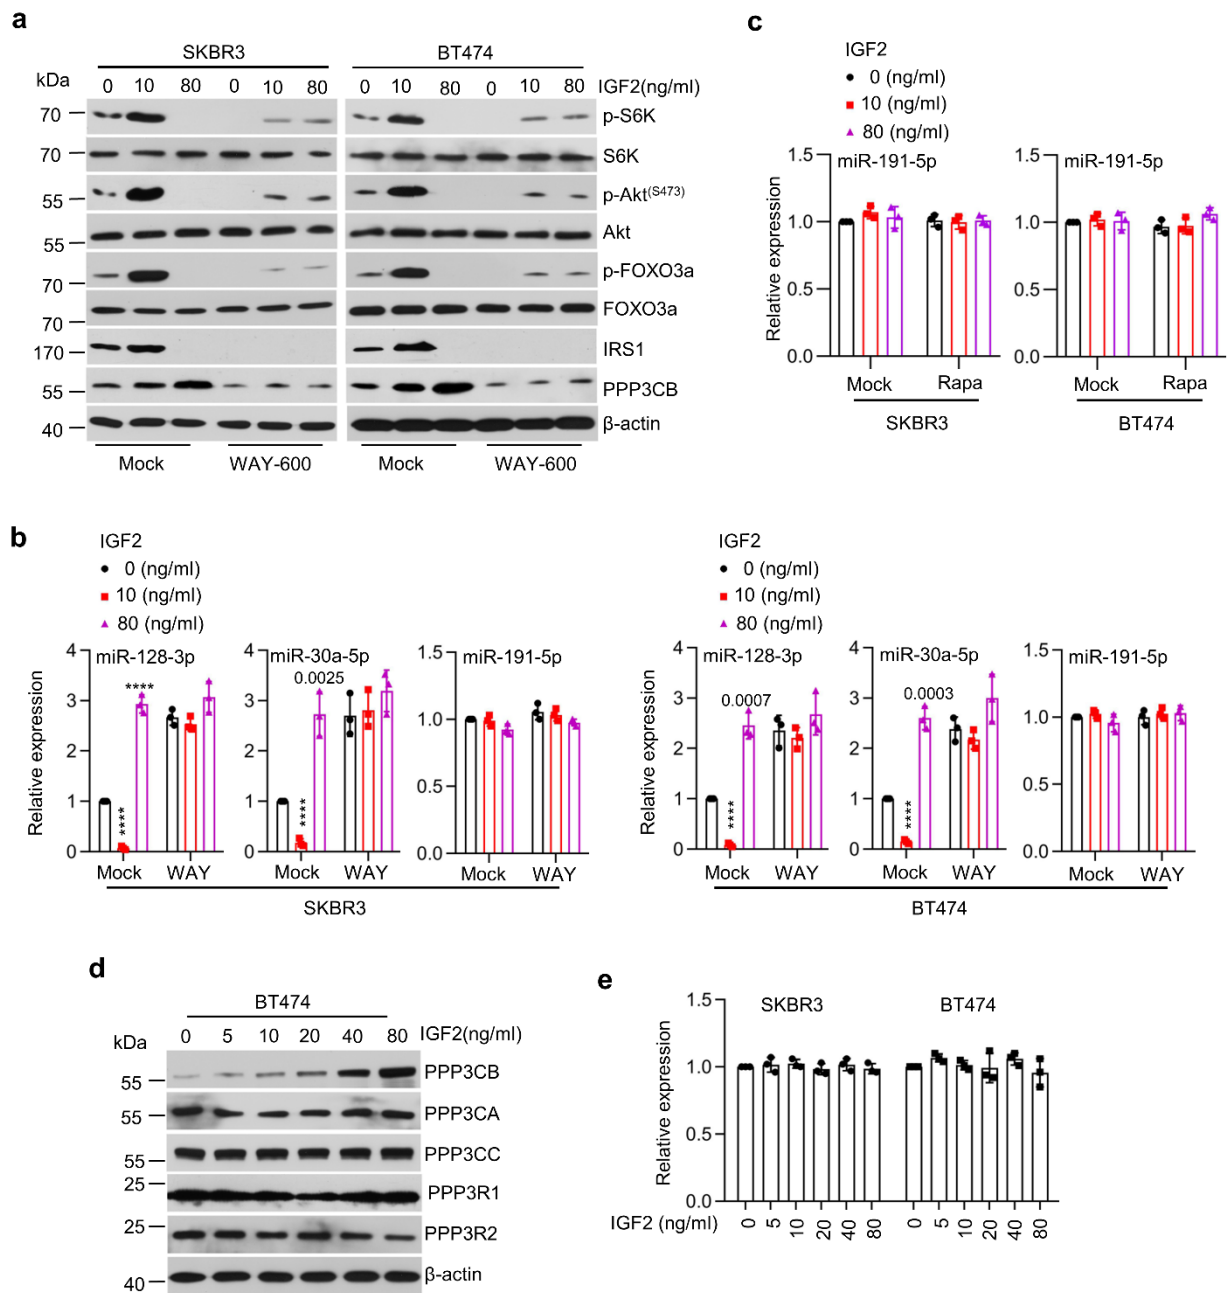

**Supplementary figure 4. PPP3CB-mediated reduction of p-FOXO3a controlled the feedback regulation.**

**a, b** SKBR3 or BT474 cells were treated with vehicle (Mock) or mTOR inhibitor WAY-600 (1  $\mu$ M) in combination with rhIGF2 at indicated concentrations for 24 hrs. The expression levels of p-Akt<sup>(S473)</sup>, Akt, p-S6K, S6K, p-FOXO3a, FOXO3a, IRS1, PPP3CB, and  $\beta$ -actin was examined by western blot assays (**a**). The expression levels of miR-128-3p, miR-30a-5p, and miR-191-5p were measured by qRT-PCR (**b**), \*\*\*\*  $p < 0.0001$ . **c** SKBR3 or BT474 cells were treated with vehicle (Mock) or Rapamycin (10  $\mu$ M, Rapa) in combination with rhIGF2 at indicated concentrations for 24



hrs. The expression level of miR-191-5p was measured by qRT-PCR. **d** BT474 cells were treated with rhIGF2 at indicated concentrations for 24 hrs. The expression of PPP3CB, PPP3CA, PPP3CC, PPP3R1, PPP3R2, and  $\beta$ -actin was examined by western blot assays. **e** SKBR3 or BT474 cells were treated with rhIGF2 at indicated concentrations for 24 hrs. The expression of *PPP3CB* was measured by qRT-PCR.  $n=3$  biologically independent samples (b, d). Data are presented as mean values  $\pm$  SEM (b, d). Statistical significance was determined by a two-tailed Student's t test (b, d). Data show a representative of three independent experiments (a, c). Source data are provided as a Source Data file.

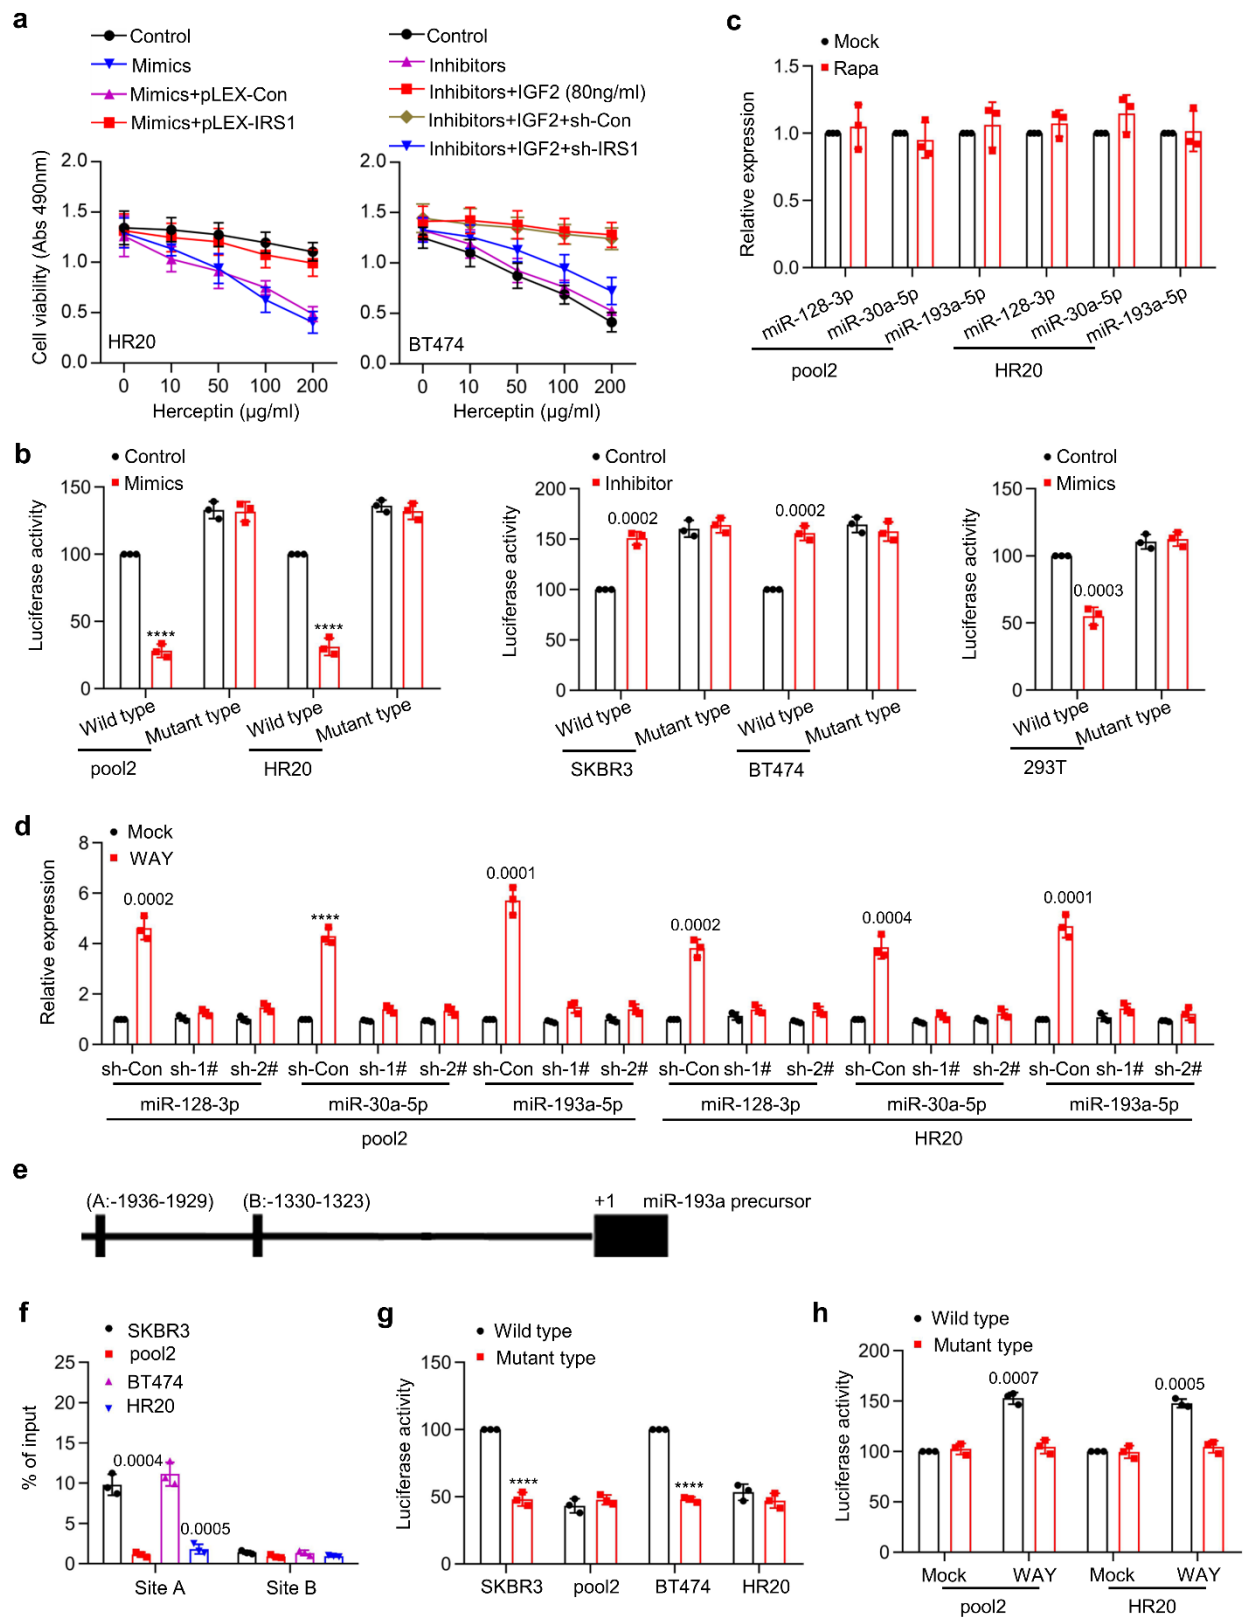

### Supplementary figure 5. Dysregulation of FOXO3a-miRNAs axis conferred Herceptin resistance.

**a** HR20 cells were transfected with miRNA mimics in combination with IRS1 expression vector (pLEX-IRS1), and then treated with Herceptin for 72 hrs. BT474 cells were transfected miRNA

inhibitors in combination with *IRS1* shRNA (sh-IRS1), and then treated with rhIGF2. The cells' sensitivity to Herceptin was evaluated by MTS assays. **b** The indicated cells were co-transfected with a luciferase reporter containing wild type or mutant *IGF2* 3'-UTR along with miR-193a-5p mimics or inhibitor. The luciferase activity was determined by the Dual-Luciferase Reporter assays. The renilla luciferase activity was used as internal control, \*\*\*\*  $p < 0.0001$ . **c** Pool2 or HR20 cells were treated with vehicle (Mock) or Rapamycin (Rapa). The levels of miR-128-3p, miR-30a-5p, and miR-193a-5p were measured by qRT-PCR. **d** Pool2 or HR20 cells were transfected with a control shRNA (sh-Con) or *FOXO3a* shRNA (sh-1# or sh-2#) followed by treatment with vehicle (Mock) or WAY-600 (WAY). The levels of miR-128-3p, miR-30a-5p, and miR-193a-5p were measured by qRT-PCR, \*\*\*\*  $p < 0.0001$ . **e** A schematic representation of FOXO3a binding sites within the 2kb putative promoter region of miR-193a. The first base of the precursor of miR-193a is defined as '+1'. **f** CHIP-qPCR assays were conducted to validate the binding of FOXO3a at miR-193a promoter. **g** miR-193a promoter containing predicted FOXO3a binding sites was cloned into the pGL4 vector. The luciferase activities in the cells were determined by the Dual-Luciferase Reporter assays, \*\*\*\*  $p < 0.0001$ . **h** Pool2 or HR20 cells were transfected with wild type or mutant miR-193a promoter reporter followed by treatment with vehicle (Mock) or WAY-600 (WAY). The luciferase activities were examined by the Dual-Luciferase Reporter assays.  $n = 3$  biologically independent samples (a, b, c, d, f-h). Data are presented as mean values  $\pm$  SEM (a, c, d, f-h). Statistical significance was determined by a two-tailed Student's *t* test (b, d, f-h). Source data are provided as a Source Data file.

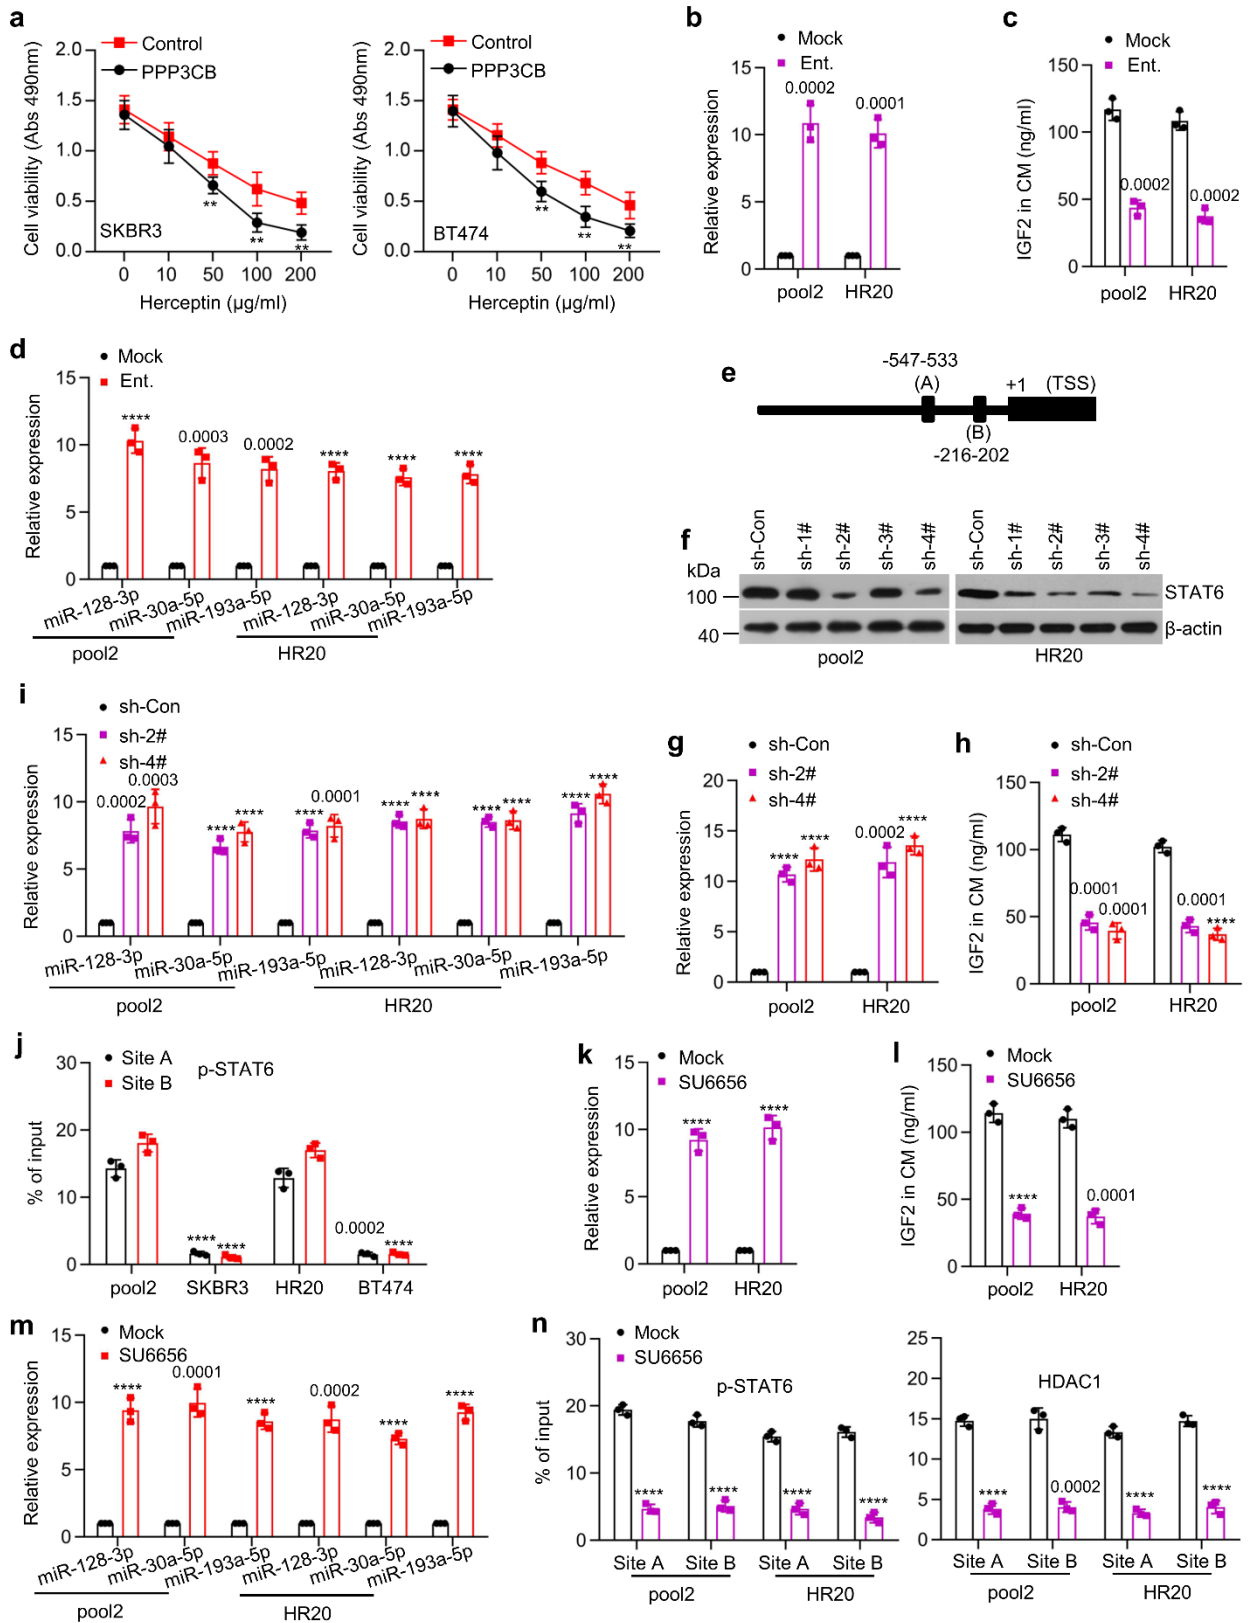

**Supplementary figure 6. Src-mediated p-STAT6/HDAC1 complex decreased PPP3CB expression in Herceptin-resistant cells.**

**a** SKBR3 or BT474 cells transfected with control vector (Control) or PPP3CB expression vector (PPP3CB) were treated with Herceptin for 72 hrs. Cell viability was evaluated by MTS assays,

SKBR3 PPP3CB: \*\*  $p=0.0082$ , \*\*  $p=0.0045$ , \*\*  $p=0.0011$ , BT474 PPP3CB: \*\*  $p=0.0026$ , \*\*  $p=0.0013$ , \*\*  $p=0.005$ . **b-d** Pool2 or HR20 cells were treated with vehicle (Mock) or entinostat (1 $\mu$ M, Ent.) for 24 hrs. The expression of *PPP3CB* mRNA was detected by qRT-PCR (**b**). IGF2 levels in the CM were examined by ELISA (**c**). The levels of miR-128-3p, miR-30a-5p, and miR-193a-5p were measured by qRT-PCR (**d**), \*\*\*\*  $p<0.0001$ . **e** A schematic representation of STAT6 binding sites within the 2kb putative promoter region of *PPP3CB* upstream the transcription start site. The first base of the transcription start site is defined as '+1'. **f-i** Pool2 or HR20 cells were transfected with control shRNA (sh-Con) or specific *STAT6* shRNAs (sh-1#, sh-2#, sh-3#, or sh-4#). The expression of STAT6 and  $\beta$ -actin was examined by western blots (**f**). The expression of *PPP3CB* mRNA was detected by qRT-PCR (**g**), \*\*\*\*  $p<0.0001$ . IGF2 levels in the CM were examined by ELISA (**h**), \*\*\*\*  $p<0.0001$ . The levels of miR-128-3p, miR-30a-5p, and miR-193a-5p were measured by qRT-PCR (**i**), \*\*\*\*  $p<0.0001$ . **j** ChIP-qPCR assays were conducted to validate the binding of p-STAT6 at the promoter region of *PPP3CB*, \*\*\*\*  $p<0.0001$ . **k-m** Pool2 or HR20 cells were treated with vehicle (Mock) or SU6656. The expression of *PPP3CB* mRNA was detected by qRT-PCR (**k**), \*\*\*\*  $p<0.0001$ . IGF2 levels in the CM were examined by ELISA (**l**), \*\*\*\*  $p<0.0001$ . The levels of miR-128-3p, miR-30a-5p, and miR-193a-5p were measured by qRT-PCR (**m**), \*\*\*\*  $p<0.0001$ . The enrichment of p-STAT6 or HDAC1 at *PPP3CB* promoter was determined by ChIP-qPCR (**n**), \*\*\*\*  $p<0.0001$ .  $n = 3$  biologically independent samples (a-d, g-l). Data are presented as mean values  $\pm$  SEM (a-d, g-l). Statistical significance was determined by a two-tailed Student's t test (a-d, g-l). Source data are provided as a Source Data file.

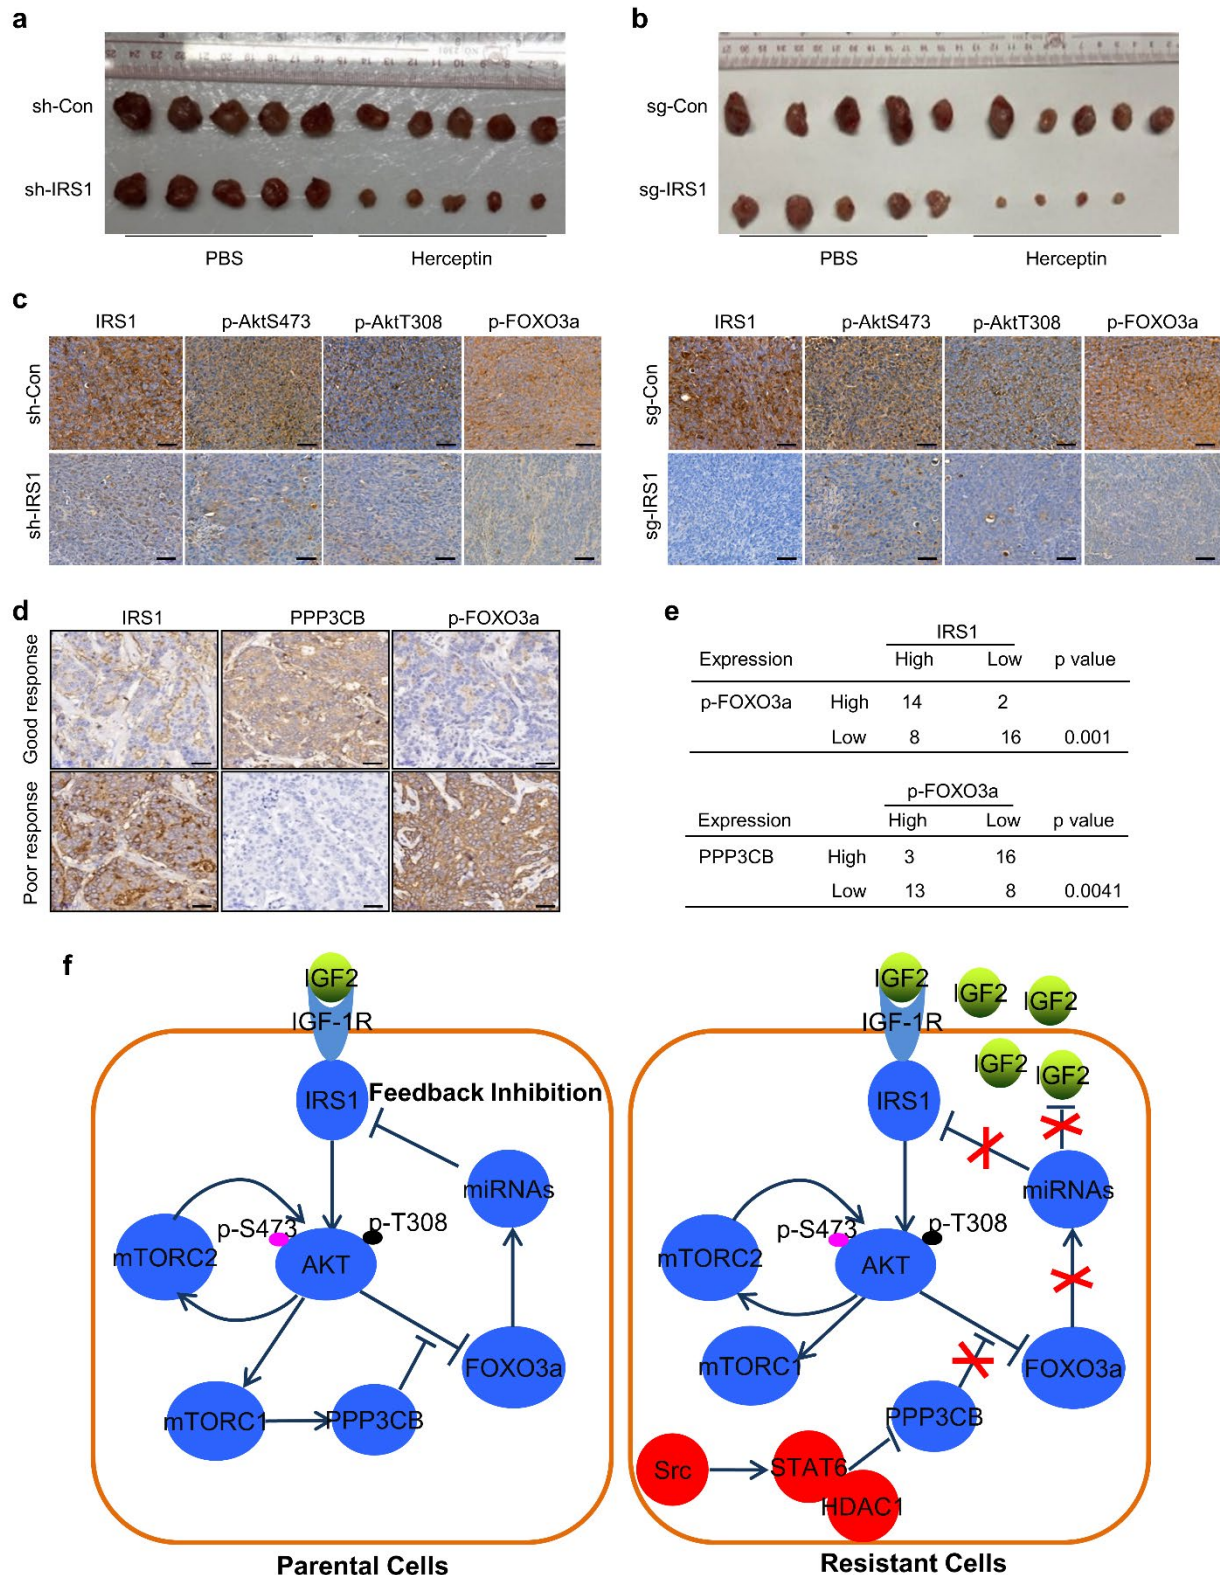

**Supplementary figure 7. PPP3CB/FOXO3a/IRS1 signaling contributed to the poor response to Herceptin-containing treatments in HER2-positive breast cancer patients.**

**a** Pool2/sh-Con and pool2/sh-IRS1 cells were subcutaneously inoculated into the armpit of female Balb/C athymic nude mice to generate xenograft tumors. When tumors reached  $\sim 100 \text{ mm}^3$ , the mice were randomly grouped and received i.p. injection of Herceptin (10 mg/kg) or PBS (n=5) once every

5 days. At the experimental endpoint, the tumors were excised and photographed. **b** Pool2 cells with control sgRNA (sg-Con) or *IRS1* gene specific sgRNA (sg-IRS1) were subcutaneously inoculated into the armpit of female Balb/C athymic nude mice to generate xenograft tumors. When tumors reached  $\sim 100 \text{ mm}^3$ , the mice were randomly grouped and received i.p. injection of Herceptin (10 mg/kg) or PBS (n=5) once every 5 days. At the experimental endpoint, the tumors were excised and photographed. **c** The expression of IRS1, p-Akt<sup>S473</sup>, p-Akt<sup>T308</sup> and p-FOXO3a in the tumors obtained from the animal experiments were examined by IHC assays. Scale bar = 50  $\mu\text{m}$ . **d** The expression of IRS1, PPP3CB, and p-FOXO3a in representative cancer specimens was examined by IHC assays. Scale bar = 50  $\mu\text{m}$ . **e** The correlation between the expression levels of IRS1 and p-FOXO3a or PPP3CB and p-FOXO3a was analyzed. **f** A proposed model of the PPP3CB/FOXO3a/IRS1 signaling dysregulation conferring Herceptin resistance. Data show a representative of three independent experiments (c, d).

Supplementary Table 1. Primers for RT-qPCR analyses of gene expression

| Primer name                           | Sequence (5' to 3')                                                                                                     |
|---------------------------------------|-------------------------------------------------------------------------------------------------------------------------|
| miR-128-3p-F                          | CGTCACAGTGAACCGGTCTCTTT                                                                                                 |
| miR-30a-5p-F                          | CGCTGTAAACATCCTCGACTGGAAG                                                                                               |
| miR-193a-5p-F                         | TATGGGTCTTTGCGGGCGA                                                                                                     |
| miR-191-5p-F                          | CAACGGAATCCCAAAAGCAGCTG                                                                                                 |
| RNU6 and Universal<br>Reverse primers | Purchased from GeneCopoeia Inc ( <a href="http://www.fulengen.com/">http://www.fulengen.com/</a> )<br>Guangzhou, China. |
| IGF1-F                                | GCTCTTCAGTTCGTGTGTGGA                                                                                                   |
| IGF1-R                                | GCCTCCTTAGATCACAGCTCC                                                                                                   |
| IGF2-F                                | GTGGCATCGTTGAGGAGTG                                                                                                     |
| IGF2-R                                | CACGTCCCTCTCGGACTTG                                                                                                     |
| IRS1-F                                | CTGCACAACCGTGCTAAGG                                                                                                     |
| IRS1-R                                | CGTCACCGTAGCTCAAGTCC                                                                                                    |
| PPP3CB-F                              | CCCCAACACATCGCTTGACAT                                                                                                   |
| PPP3CB-R                              | GGCAGCACCCCTCATTGATAATTC                                                                                                |
| GAPDH-F                               | AAGGTGAAGGTCGGAGTCAA                                                                                                    |
| GAPDH-R                               | AATGAAGGGGTCATTGATGG                                                                                                    |



Supplementary Table 2. Primers for ChIP-qPCR analyses:

| Primer name          | Sequence (5' to 3')       |
|----------------------|---------------------------|
| miR-128a - Site A-F  | TGATAGTTTATTGTTTTTGAGTTTT |
| miR-128a - Site A-R  | CAGATTGGGATAGTAGAATGTAGAG |
| miR-128a - Site B-F  | TCAAACAACACTTGCTTACCC     |
| miR-128a - Site B-R  | ACTTTTAAACATTACTTGTGCCAC  |
| miR-128a - Site C-F  | CAGGACTAACATTACTGCTGGGGA  |
| miR-128a - Site C-R  | GAAAGTCTTATGTGTGTAGCCAGGG |
| miR-30a - Site A-F   | TAAAAGTGGTAAGATTCCAAGGCA  |
| miR-30a - Site A-R   | TAGATAAATACCAAGGCTTACACCC |
| miR-30a - Site B-F   | TTTTCACCTGCTGACTCAAAGATTA |
| miR-30a - Site B-R   | CAAAAATAAAATCCACACAAAAGC  |
| miR-30a - Site C-F   | CTTTCACTAGATTCAGAATGGTTTT |
| miR-30a - Site C -R  | ACACAGAACCTATCACTCACAACAG |
| miR-193a - Site A-F  | TGTGCCACCACGCCAGCTAAT     |
| miR-193a - Site A -R | CGCACACCTGTAATCCCAGCACTTT |
| miR-193a - Site B-F  | TCCCCTCCTTTTCCACAGTCTCC   |
| miR-193a - Site B-R  | GTACCGGGCAGCATACTTTCTTGAG |
| PPP3CB - Site A-F    | CCATAAGTCACCTGGGCCAGCA    |
| PPP3CB - Site A-R    | GTCTGAAAGCACAGAATAAGACTGC |
| PPP3CB - Site B-F    | CTCTGGTCCCCTACCAACCCTTC   |
| PPP3CB - Site B-R    | GCATGCAGAATGAAGAATGAGGAGG |
